# Supplementary material for: Submicron-thick single anion-conducting polymer electrolytes
Source: Royal Society of Chemistry journal article supplement (doi:10.1039/d3lf00257h), 2024-01-01
Supplement: d3lf00257h1.pdf [file d3lf00257h1.pdf]

## Supplementary Information

### Submicron-Thick Single Anion-Conducting Polymer Electrolytes

Hunter O. Ford,<sup>1</sup> Brian L. Chaloux,<sup>2</sup> Youngchan Kim,<sup>3</sup> Jeffrey W. Long,<sup>2</sup> Debra R. Rolison,<sup>2\*</sup> and Megan B. Sassin<sup>2\*</sup>

\*Corresponding Authors: E-mail: [megan.sassin@nrl.navy.mil](mailto:megan.sassin@nrl.navy.mil); [debra.r.rolison.civ@us.navy.mil](mailto:debra.r.rolison.civ@us.navy.mil)

<sup>1</sup> NRL–NRC Postdoctoral Associate in the Chemistry Division, U.S. Naval Research Laboratory, Washington, DC 20375, USA

<sup>2</sup> Chemistry Division, U.S. Naval Research Laboratory, Washington, DC 20375, USA

<sup>3</sup> Materials Science & Technology Division, U.S. Naval Research Laboratory, Washington, DC 20375, USA

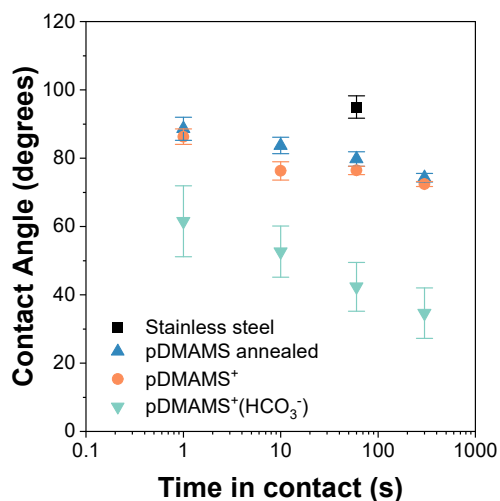

Fig. S1 Contact-angle measurements for various iCVD-derived pDMAMS films.

**Table S1** Fit parameters from dry Nyquist equivalent-circuit models.

| Sample ID           | R1        | R2          | Q <sub>1</sub>              | Q <sub>1_a</sub> |
|---------------------|-----------|-------------|-----------------------------|------------------|
| Br_1                | 67        | 1128        | 1.0×10 <sup>-10</sup>       | 1                |
| Br_2                | 52        | 1291        | 1.2×10 <sup>-10</sup>       | 1                |
| Br_3                | 103       | 1070        | 0.7×10 <sup>-10</sup>       | 1                |
| Br_4                | 22        | 1414        | 2.8×10 <sup>-10</sup>       | 1                |
| Br_5                | 38        | 885         | 1.4×10 <sup>-10</sup>       | 1                |
| <b>Average</b>      | <b>56</b> | <b>1158</b> | <b>1.4×10<sup>-10</sup></b> | <b>1</b>         |
| HCO <sub>3</sub> _1 | 62        | 97          | 4.5×10 <sup>-9</sup>        | 0.9              |
| HCO <sub>3</sub> _2 | 93        | 11          | 5.3×10 <sup>-10</sup>       | 1                |
| HCO <sub>3</sub> _3 | 87        | 56          | 1.2×10 <sup>-9</sup>        | 1                |
| HCO <sub>3</sub> _4 | 119       | 78          | 2.2×10 <sup>-8</sup>        | 0.8              |
| HCO <sub>3</sub> _5 | 58        | 145         | 6.7×10 <sup>-10</sup>       | 1                |
| HCO <sub>3</sub> _6 | 115       | 48          | 1.1×10 <sup>-7</sup>        | 0.75             |
| <b>Average</b>      | <b>84</b> | <b>77</b>   | <b>5.8×10<sup>-9</sup></b>  | <b>0.94</b>      |
| OH_1                | 76        | 56          | 1.7×10 <sup>-8</sup>        | 0.85             |
| OH_2                | 76        | 37          | 2.5×10 <sup>-8</sup>        | 0.85             |
| OH_3                | 67        | 66          | 1.7×10 <sup>-8</sup>        | 0.85             |
| OH_4                | 75        | 42          | 1.1×10 <sup>-8</sup>        | 0.9              |
| OH_5                | 74        | 56          | 7.6×10 <sup>-9</sup>        | 0.9              |
| OH_6                | 58        | 89          | 6.0×10 <sup>-9</sup>        | 0.9              |
| <b>Average</b>      | <b>74</b> | <b>51</b>   | <b>1.6×10<sup>-8</sup></b>  | <b>0.87</b>      |

**Table S2** Fit parameters from water-swelled Nyquist equivalent-circuit models.

| Sample ID           | R1        | R2        | Q <sub>1</sub>             | Q <sub>1_a</sub> | Q <sub>2</sub>             | Q <sub>2_a</sub> |
|---------------------|-----------|-----------|----------------------------|------------------|----------------------------|------------------|
| Br_1                | 24        | 23        | 7.3×10 <sup>-9</sup>       | 1                | 5.4×10 <sup>-5</sup>       | 0.68             |
| Br_2                | 15        | 68        | 4.7×10 <sup>-9</sup>       | 1                | 4.2×10 <sup>-5</sup>       | 0.70             |
| Br_3                | 21        | 34        | 6.8×10 <sup>-9</sup>       | 1                | 6.2×10 <sup>-5</sup>       | 0.70             |
| Br_4                | 29        | 23        | 8.7×10 <sup>-9</sup>       | 1                | 2.0×10 <sup>-4</sup>       | 0.59             |
| <b>average</b>      | <b>22</b> | <b>37</b> | <b>6.9×10<sup>-9</sup></b> | <b>1</b>         | <b>9.2×10<sup>-5</sup></b> | <b>0.67</b>      |
| HCO <sub>3</sub> _1 | 20        | 7         | 5.4×10 <sup>-7</sup>       | 0.95             | 9.2×10 <sup>-5</sup>       | 0.67             |
| HCO <sub>3</sub> _2 | 19        | 11        | 1.8×10 <sup>-7</sup>       | 1                | 1.0×10 <sup>-4</sup>       | 0.66             |
| HCO <sub>3</sub> _3 | 30        | 11        | 2.3×10 <sup>-7</sup>       | 0.97             | 1.0×10 <sup>-4</sup>       | 0.67             |
| <b>average</b>      | <b>23</b> | <b>10</b> | <b>3.2×10<sup>-7</sup></b> | <b>0.97</b>      | <b>9.8×10<sup>-5</sup></b> | <b>0.67</b>      |
| OH_1                | 19        | 26        | 7.3×10 <sup>-9</sup>       | 1                | 8.3×10 <sup>-5</sup>       | 0.72             |
| OH_2                | 0         | 17        | 1.1×10 <sup>-5</sup>       | 0.45             | 1.9×10 <sup>-4</sup>       | 0.63             |
| OH_3                | 21        | 14        | 6.5×10 <sup>-6</sup>       | 0.8              | 4.9×10 <sup>-5</sup>       | 0.71             |
| OH_4                | 16        | 8         | 2.2×10 <sup>-6</sup>       | 0.91             | 5.5×10 <sup>-5</sup>       | 0.71             |
| OH_5                | 13        | 9         | 5.5×10 <sup>-6</sup>       | 0.85             | 5.2×10 <sup>-5</sup>       | 0.74             |
| <b>average</b>      | <b>14</b> | <b>15</b> | <b>5.0×10<sup>-6</sup></b> | <b>0.8</b>       | <b>8.6×10<sup>-5</sup></b> | <b>0.70</b>      |

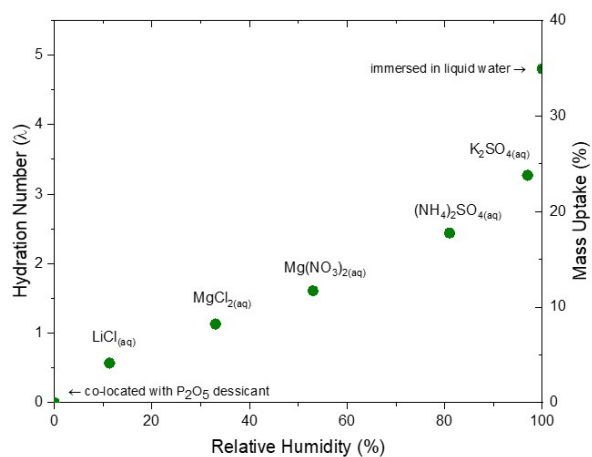

**Fig. S2** Water uptake in hydration number ( $\lambda$ ) and percent mass (of the dry membrane mass) for pDMAMS<sup>+</sup>(Br<sup>-</sup>) equilibrated over P<sub>2</sub>O<sub>5</sub> (0% RH), various salt solutions (11–97% RH), and in liquid deionized water (100% RH).

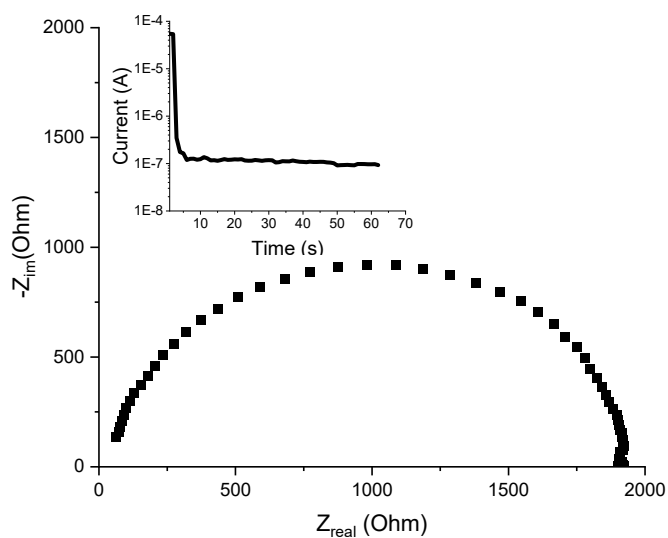

**Fig. S3** EIS spectra of pDMAMS<sup>+</sup>(Br<sup>-</sup>) showing adequate electrode-electrolyte contact. Inset: current response of potentiostatic hold at 0.1 V.
